# Supplementary material for: CUBCO+: prediction of protein complexes based on min-cut network partitioning into biclique spanned subgraphs
Source: Springer Nature journal article supplement (doi:10.1007/s41109-022-00508-5), 2022-10-11
Supplement: MOESM1 [file 23593546]

## Evaluation metrics

Here, we adopt twelve well-established metrics to assess the quality of predicted protein complexes, including sensitivity, positive predictive value, accuracy, and separation from (Brohée & van Helden, 2006), fraction match, and maximum matching ratio from (Nepusz, et al., 2012), precision, recall, and F-measure from (Liu, et al., 2009), and precision<sup>+</sup>, recall<sup>+</sup>, and F-measure<sup>+</sup> from (Maddi, et al., 2019). Given a set of predicted protein complexes  $P$  and a set of reference protein complexes  $C$ , a contingency table  $T$  is assembled with  $n$  rows denoting complexes in  $C$ , and  $m$  columns representing clusters in  $P$ . The entry  $t_{i,j}$  indicates the number of shared proteins between complex  $i$  and cluster  $j$ .  $N_i$  denotes the number of proteins in complex  $i$ ,  $N = \sum_i N_i$ , and  $P_j$  stands for the number of proteins in cluster  $j$ . For approaches that predict overlapping clusters, the marginal row, and column sums may not correspond to the size of reference and predicted complexes, respectively. The positive predictive value (PPV), sensitivity (SN), accuracy (ACC), and separation (SEP) are defined as:

$$PPV = \frac{\sum_j \max_i(t_{i,j})}{\sum_j \sum_i t_{i,j}}, \quad (1)$$

$$SN = \frac{\sum_i \max_j(t_{i,j})}{\sum_i t_{i,j}}, \quad (2)$$

$$ACC = \sqrt{PPV \times SN}, \quad (3)$$

$$SEP = \sqrt{\frac{1}{nm} \sum_i \sum_j \left( \frac{t_{i,j}}{t_j} \times \frac{t_{i,j}}{t_i} \right) \times \sum_j \sum_i \left( \frac{t_{i,j}}{t_j} \times \frac{t_{i,j}}{t_i} \right)}. \quad (4)$$

Accuracy considers both SN and PPV, and it shows the overall performance. Furthermore, separation is a product of the proportion of proteins of a reference complex that are found in a predicted complex and the proportion of proteins in a predicted complex that is in a reference complex, to quantify a relationship between predicted and reference complexes.

The fraction match (FRM) first calculates the overlap score between reference and predicted complex,  $i$  and  $j$ , in which the overlap score (OS) is given by

$$OS = \frac{t_{i,j}^2}{N_i P_j}. \quad (5)$$

Then we considered the fraction of predicted complexes whose OS is higher than 0.25, as suggested by (Nepusz, et al., 2012). The maximum matching ratio (MMR) is given by the value of the maximum matching per complex in a bipartite graph, with vertices corresponding to the reference and predicted complexes, as two partitions. In this graph, the edges are weighted by the overlap score between respective reference and predicted complexes.

To calculate precision and recall, we first determine if any of the predicted complexes match with any of the reference complexes. Following (Liu, et al., 2009; Habibi, et al., 2010; Srihari, et al., 2015), we employed Jaccard similarity (i.e.  $Jaccard(P, C) = \frac{|P \cap C|}{|P \cup C|}$ ). Thereby, the predicted complex matches the reference complex if their Jaccard similarity is higher than 0.5. Hence, precision, recall, and F-measure are defined as:

$$Precision = \frac{|\{p_i \in P | \exists c_j \in C, p_i \text{ matches } c_j\}|}{|P|}, \quad (6)$$

$$Recall = \frac{|\{c_i \in C | \exists p_j \in P, p_j \text{ matches } c_i\}|}{|C|}, \quad (7)$$

$$F - measure = \frac{2 \times Precision \times Recall}{Precision + Recall}. \quad (8)$$

F-measure considers both precision and recall. Thereby, it illustrates the overall performance.

The precision<sup>+</sup> and recall<sup>+</sup> are given by  $\frac{N_P^+}{|P|}$  and  $\frac{N_C^+}{|C|}$ , respectively. Whereby,  $N_P^+$  and  $N_C^+$  are defined as:

$$N_P^+ = |\{p_i \in P | \exists c_j \in C, OS(p_i, c_j) \geq \theta, (p_i, c_j) \in Match(P, C, \theta)\}|, \quad (9)$$

$$N_C^+ = |\{c_j \in C | \exists p_i \in P, OS(p_i, c_j) \geq \theta, (p_i, c_j) \in Match(P, C, \theta)\}|. \quad (10)$$

The OS computes the overlap score between reference and predicted complexes, while  $Match(P, C, \theta)$  includes the edges in the induced maximum matching of the bipartite graph that has reference complexes on one side and the predicted complexes on the other side. The F-measure<sup>+</sup> is calculated the same way as the original F-measure, likewise, it shows the overall performance.

**Supplementary Figure 1. Comparative analysis of approaches for prediction of protein complexes.** The comparative analyses are conducted concerning a composite score combining four performance measures, maximum matching ratio (MMR), fraction match (FRM), accuracy (ACC), and F-measure. Seventeen approaches, ordered by the year of publication, are compared on (A – C) two PPI networks of *E. coli* regarding Ecocyc and Metabolic gold standards, respectively, (D – J) four PPI networks of *S. cerevisiae* regarding SGD and CYC2008 gold standard, and (K) STRING PPI network of *H. sapiens* regarding CORUM gold standard.

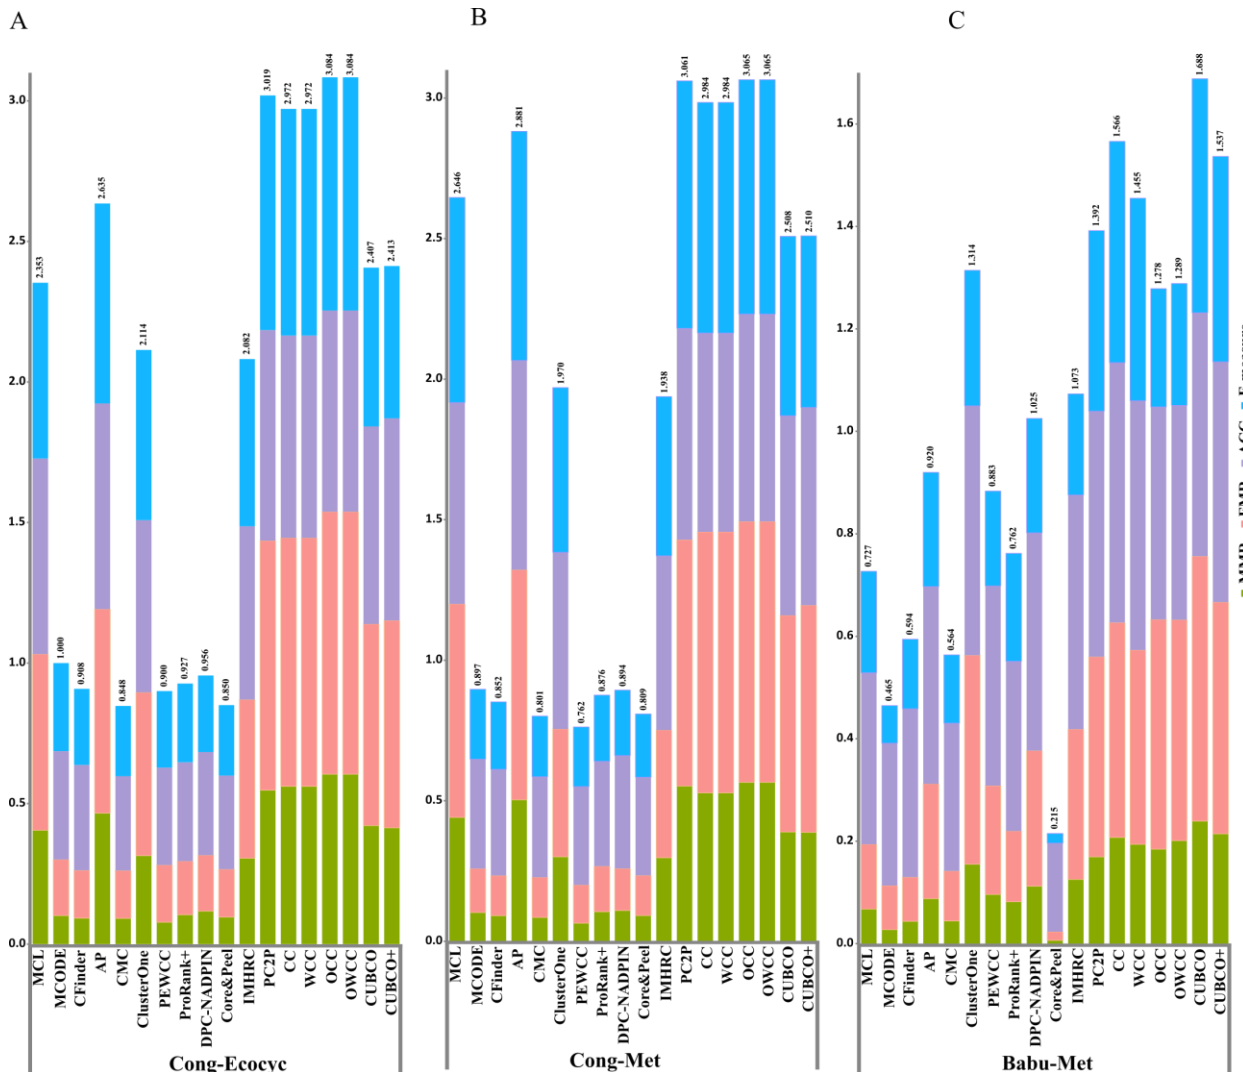

G

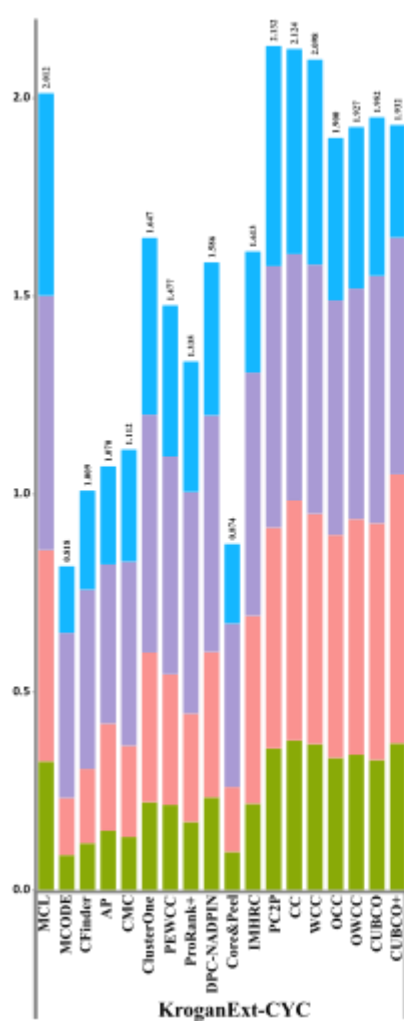

H

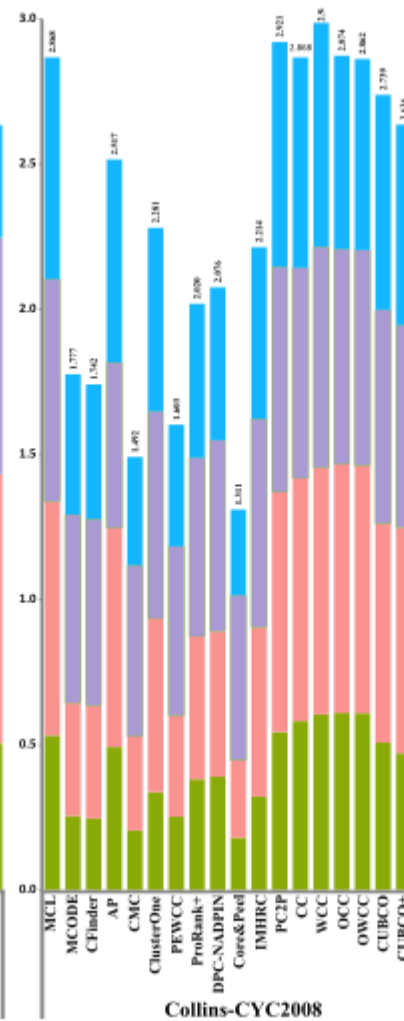

I

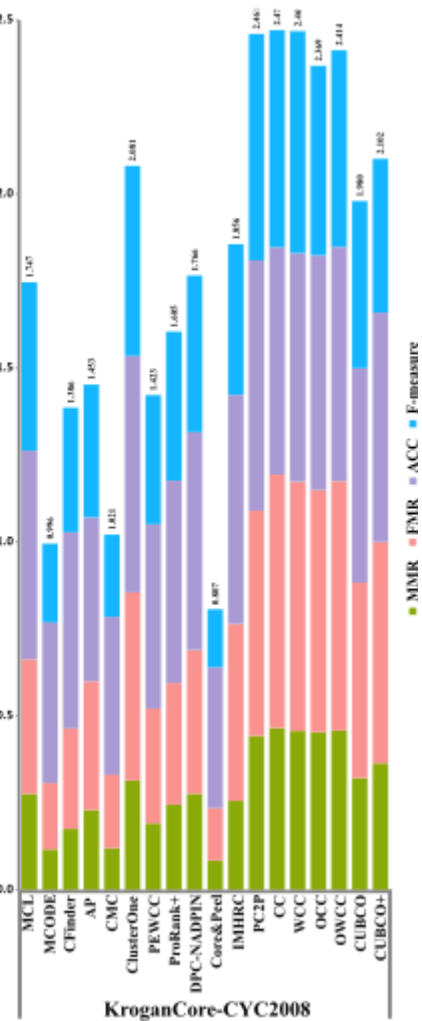

■ MMR ■ FMR ■ ACC ■ F-measure

G

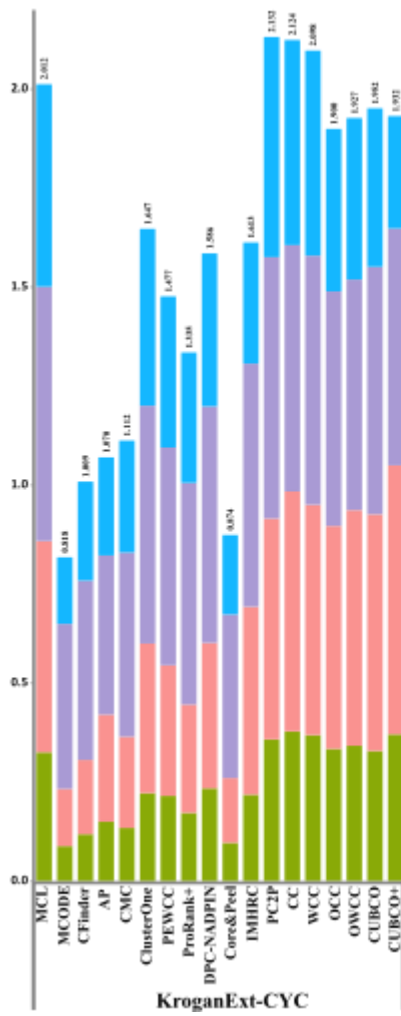

H

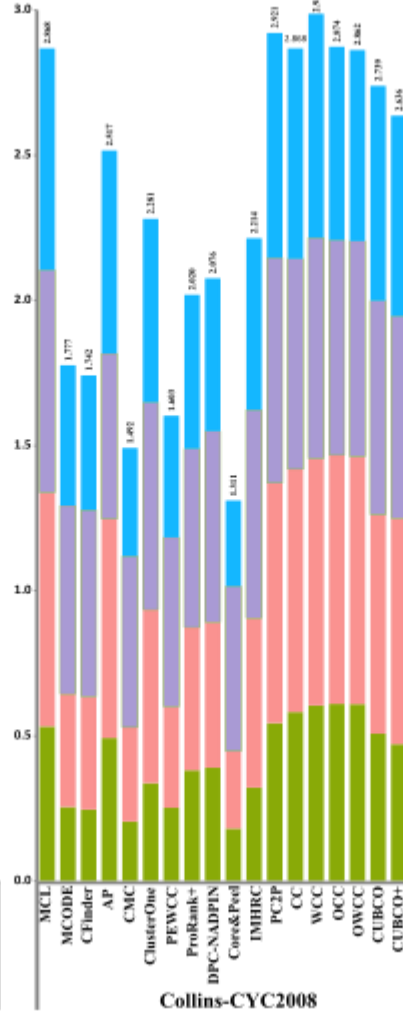

I

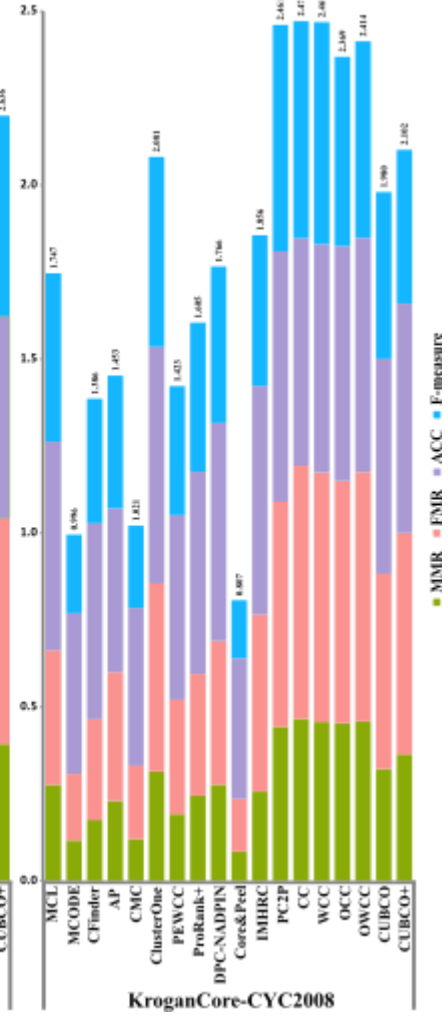

J

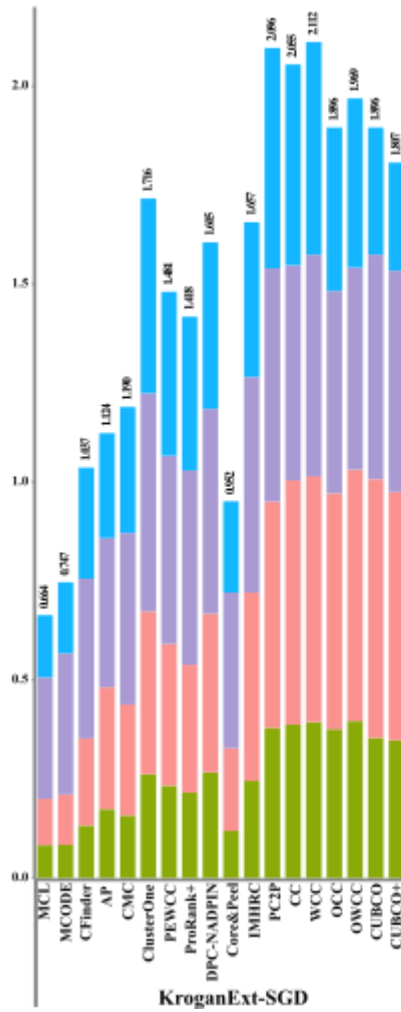

K

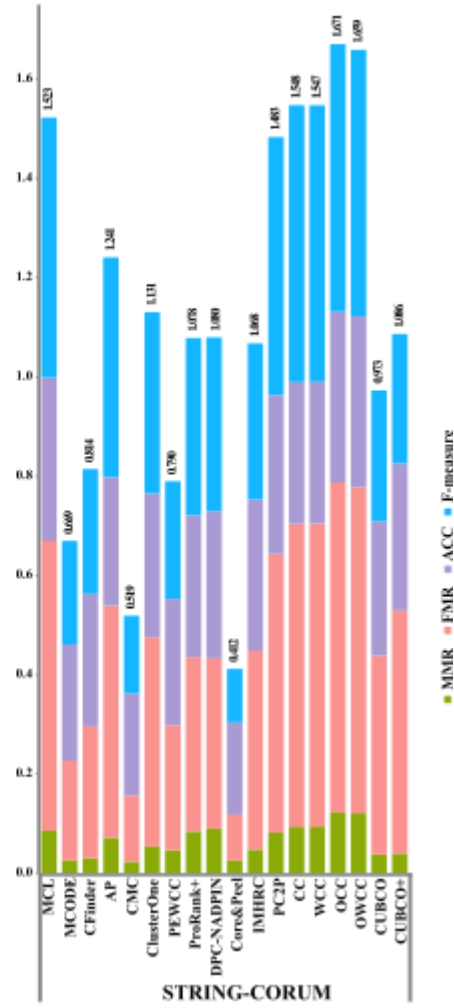

## References

Brohée, S. & van Helden, J., 2006. Evaluation of clustering algorithms for protein-protein interaction networks. *BMC Bioinformatics*, 11. Volume 7.

Habibi, M., Eslahchi, C. & Wong, L., 2010. Protein complex prediction based on k-connected subgraphs in protein interaction network. *BMC Systems Biology*, Volume 4, p. 129.

Liu, G., Wong, L. & Chua, H. N., 2009. Complex discovery from weighted PPI networks. *Bioinformatics*, 5, Volume 25, p. 1891–1897.

Maddi, A. M. A., Moughari, F. A., Balouchi, M. M. & Eslahchi, C., 2019. CDAP: An Online Package for Evaluation of Complex Detection Methods. *Scientific Reports*, 9. Volume 9.

Nepusz, T., Yu, H. & Paccanaro, A., 2012. Detecting overlapping protein complexes in protein-protein interaction networks. *Nature Methods*, 3, Volume 9, p. 471–472.

Srihari, S., Yong, C. H., Patil, A. & Wong, L., 2015. Methods for protein complex prediction and their contributions towards understanding the organisation, function and dynamics of complexes. *FEBS Letters*, 4, Volume 589, p. 2590–2602.

**SupplementaryTable 1.** Shown are the properties, i.e. number of proteins and interactions, in the PPI networks used in our analysis. E stands for *E.Coli*, Y for yeast, H for human, P for Plants, and A for Animal. We also show the number of proteins and complexes in each of the gold standards used in our analysis. Finally, we also show the number of nodes and edges in the intersection of the PPI networks and gold standards of *E.coli*, yeast, human, plants, and Animal respectively.

| PPI networks  |          |          |             |           |                |               |            |          |
|---------------|----------|----------|-------------|-----------|----------------|---------------|------------|----------|
|               | Babu (E) | Cong (E) | Collins (Y) | Gavin (Y) | KroganCore (Y) | KroganExt (Y) | STRING (H) | PIPS (H) |
| #Proteins     | 2,045    | 1,476    | 1,622       | 1,855     | 2,708          | 3,672         | 2,227      | 1,673    |
| #Interactions | 12,801   | 1,618    | 9,074       | 7,669     | 7,123          | 14,317        | 8,565      | 5,385    |
| weighted      | Yes      | No       | Yes         | Yes       | Yes            | Yes           | Yes        | Yes      |

#### Gold standards

|                     | Ecocyc(E) | Metabolite(Y) | SGD(Y) | CYC2008(Y) | Corum(H) |
|---------------------|-----------|---------------|--------|------------|----------|
| #proteins           | 749       | 475           | 1,279  | 1,627      | 4,479    |
| #complexes          | 299       | 206           | 323    | 408        | 4,274    |
| #complexes $\geq 3$ | 181       | 118           | 238    | 236        | 2,783    |

#### Intersection of PPI networks and gold standards

| SGD           | Collins(Y) | Gavin(Y) | KroganCore(Y) | KroganExt(Y) |
|---------------|------------|----------|---------------|--------------|
| #Proteins     | 830        | 776      | 944           | 1,057        |
| #interactions | 2,955      | 2,639    | 2,554         | 3,688        |

| CYC2008       | Collins(Y) | Gavin(Y) | KroganCore(Y) | KroganExt(Y) |
|---------------|------------|----------|---------------|--------------|
| #Proteins     | 1,116      | 1,047    | 1,149         | 1,263        |
| #interactions | 6,392      | 4,031    | 3,169         | 4,714        |

| Corum         | STRING(H) | PIPS(H) |
|---------------|-----------|---------|
| #Proteins     | 1,711     | 871     |
| #interactions | 7,289     | 2,692   |

| Ecocyc        | Babu(E) | Cong(E) |
|---------------|---------|---------|
| #Proteins     | 414     | 513     |
| #interactions | 1,718   | 480     |

| Metabolic     | Babu(E) | Cong(E) |
|---------------|---------|---------|
| #Proteins     | 289     | 315     |
| #interactions | 815     | 276     |



**SupplementaryTable 2.** Overview of the contending algorithms used in this study.

| Method      | Year | Weighted | Overlap | Website                                                                                                                                                                       |
|-------------|------|----------|---------|-------------------------------------------------------------------------------------------------------------------------------------------------------------------------------|
| MCL         | 2002 | ✓        | ✓       | <a href="https://micans.org/mcl/">https://micans.org/mcl/</a>                                                                                                                 |
| MCODE       | 2003 | x        | ✓       | <a href="http://www.rbvi.ucsf.edu/cytoscape/clusterMaker2/">http://www.rbvi.ucsf.edu/cytoscape/clusterMaker2/</a>                                                             |
| CFinder     | 2006 | ✓        | ✓       | <a href="http://cfinder.org/">http://cfinder.org/</a>                                                                                                                         |
| AP          | 2007 | x        | x       | <a href="http://www.rbvi.ucsf.edu/cytoscape/clusterMaker2/">http://www.rbvi.ucsf.edu/cytoscape/clusterMaker2/</a>                                                             |
| CMC         | 2009 | ✓        | ✓       | <a href="https://www.comp.nus.edu.sg/~wongls/projects/complexprediction/CMC-26may09/">https://www.comp.nus.edu.sg/~wongls/projects/complexprediction/CMC-26may09/</a>         |
| ClusterOne  | 2012 | ✓        | ✓       | <a href="http://www.rbvi.ucsf.edu/cytoscape/clusterMaker2/">http://www.rbvi.ucsf.edu/cytoscape/clusterMaker2/</a>                                                             |
| PEWCC       | 2013 | ✓        | x       | <a href="https://faculty.uaeu.ac.ae/nzaki/Research.htm">https://faculty.uaeu.ac.ae/nzaki/Research.htm</a>                                                                     |
| ProrankPlus | 2014 | ✓        | ✓       | <a href="https://faculty.uaeu.ac.ae/nzaki/Research.htm">https://faculty.uaeu.ac.ae/nzaki/Research.htm</a>                                                                     |
| DPC-NADPIN  | 2016 | x        | ✓       | <a href="https://github.com/ccnuyili/DPC-NADPIN">https://github.com/ccnuyili/DPC-NADPIN</a>                                                                                   |
| Core&Peel   | 2016 | ✓        | ✓       | <a href="http://bioalgo.iit.cnr.it/ppin/index.php?page=param&amp;id=572664770&amp;fn=DIP">http://bioalgo.iit.cnr.it/ppin/index.php?page=param&amp;id=572664770&amp;fn=DIP</a> |
| IMHRC       | 2017 | ✓        | ✓       | <a href="http://www.eslahchilab.ir/software/cdap">http://www.eslahchilab.ir/software/cdap</a>                                                                                 |
| PC2P        | 2020 | x        | x       | <a href="https://github.com/SaraOmranian/PC2P">https://github.com/SaraOmranian/PC2P</a>                                                                                       |
| GCC-v       | 2021 | ✓        | ✓       | <a href="https://github.com/SaraOmranian/GCC-v">https://github.com/SaraOmranian/GCC-v</a>                                                                                     |
| CUBCO       | 2022 | ✓        | x       | <a href="https://github.com/SaraOmranian/CUBCO">https://github.com/SaraOmranian/CUBCO</a>                                                                                     |

**SupplementaryTable 3.** Comparative analysis of eight algorithms for prediction of protein complexes with respect to twelve performance measures as well as two composite scores.

| <b>Comparative analysis</b> |             |            |       |       |       |       |       |       |       |       |           |       |       |            |                  |                                                     |            |
|-----------------------------|-------------|------------|-------|-------|-------|-------|-------|-------|-------|-------|-----------|-------|-------|------------|------------------|-----------------------------------------------------|------------|
| <b>Yeast - CYC2008</b>      |             |            |       |       |       |       |       |       |       |       |           |       |       |            |                  |                                                     |            |
| Data-set                    | Method      | # Clusters | MMR   | FRM   | SEP   | PPV   | SN    | ACC   | Prec  | Rec   | F-measure | prec+ | rec+  | f-measure+ | MMR + f-measure+ | Composite Score (CS)<br>MMR + FRM + ACC + F-measure | CS Ranking |
| Collins                     | MCL         | 184        | 0.533 | 0.805 | 0.731 | 0.615 | 0.956 | 0.767 | 0.908 | 0.659 | 0.763     | 0.875 | 0.549 | 0.675      | 1.208            | 2.868                                               | 4          |
|                             | MCODE       | 93         | 0.255 | 0.389 | 0.528 | 0.665 | 0.633 | 0.649 | 0.892 | 0.331 | 0.483     | 0.849 | 0.270 | 0.409      | 0.665            | 1.777                                               | 14         |
|                             | CFinder     | 89         | 0.247 | 0.389 | 0.493 | 0.532 | 0.775 | 0.642 | 0.888 | 0.314 | 0.464     | 0.843 | 0.256 | 0.393      | 0.640            | 1.742                                               | 15         |
|                             | AP          | 194        | 0.493 | 0.754 | 0.578 | 0.454 | 0.716 | 0.570 | 0.799 | 0.621 | 0.699     | 0.753 | 0.498 | 0.600      | 1.092            | 2.517                                               | 9          |
|                             | CMC         | 119        | 0.205 | 0.324 | 0.333 | 0.646 | 0.538 | 0.590 | 0.622 | 0.266 | 0.373     | 0.571 | 0.232 | 0.330      | 0.535            | 1.492                                               | 17         |
|                             | ClusterOne  | 127        | 0.338 | 0.597 | 0.553 | 0.611 | 0.833 | 0.714 | 0.898 | 0.488 | 0.632     | 0.819 | 0.355 | 0.495      | 0.833            | 2.281                                               | 10         |
|                             | PEWCC       | 226        | 0.253 | 0.348 | 0.250 | 0.517 | 0.657 | 0.583 | 0.730 | 0.294 | 0.419     | 0.336 | 0.259 | 0.293      | 0.546            | 1.603                                               | 16         |
|                             | ProrankPlus | 458        | 0.382 | 0.491 | 0.238 | 0.477 | 0.796 | 0.616 | 0.683 | 0.433 | 0.530     | 0.251 | 0.392 | 0.306      | 0.688            | 2.020                                               | 13         |
|                             | DPC-NADPIN  | 522        | 0.391 | 0.502 | 0.215 | 0.538 | 0.804 | 0.658 | 0.648 | 0.444 | 0.527     | 0.218 | 0.389 | 0.280      | 0.670            | 2.076                                               | 12         |
|                             | Core&Peel   | 210        | 0.181 | 0.266 | 0.198 | 0.647 | 0.499 | 0.568 | 0.457 | 0.218 | 0.296     | 0.276 | 0.198 | 0.231      | 0.412            | 1.311                                               | 18         |
|                             | IMHRC       | 117        | 0.322 | 0.584 | 0.552 | 0.605 | 0.851 | 0.717 | 0.915 | 0.437 | 0.591     | 0.846 | 0.338 | 0.483      | 0.805            | 2.214                                               | 11         |
|                             | PC2P        | 191        | 0.545 | 0.826 | 0.738 | 0.671 | 0.897 | 0.776 | 0.895 | 0.683 | 0.775     | 0.864 | 0.563 | 0.682      | 1.227            | 2.921                                               | 2          |
|                             | CC          | 250        | 0.582 | 0.836 | 0.694 | 0.754 | 0.697 | 0.725 | 0.736 | 0.713 | 0.724     | 0.704 | 0.601 | 0.648      | 1.231            | 2.868                                               | 5          |
|                             | WCC         | 241        | 0.605 | 0.850 | 0.722 | 0.759 | 0.762 | 0.761 | 0.797 | 0.747 | 0.771     | 0.755 | 0.621 | 0.682      | 1.287            | 2.987                                               | 1          |
|                             | OCC         | 515        | 0.610 | 0.857 | 0.430 | 0.593 | 0.925 | 0.741 | 0.598 | 0.751 | 0.666     | 0.353 | 0.621 | 0.450      | 1.061            | 2.874                                               | 3          |
|                             | OWCC        | 516        | 0.610 | 0.853 | 0.431 | 0.596 | 0.923 | 0.742 | 0.587 | 0.747 | 0.658     | 0.351 | 0.618 | 0.447      | 1.057            | 2.862                                               | 6          |
|                             | CUBCO       | 185        | 0.508 | 0.754 | 0.719 | 0.659 | 0.823 | 0.736 | 0.881 | 0.638 | 0.740     | 0.822 | 0.519 | 0.636      | 1.144            | 2.739                                               | 7          |
|                             | CUBCO+      | 182        | 0.472 | 0.778 | 0.664 | 0.655 | 0.740 | 0.696 | 0.736 | 0.650 | 0.690     | 0.637 | 0.451 | 0.528      | 1.000            | 2.636                                               | 8          |

| Data-set | Method      | # Clusters | MMR   | FRM   | SEP   | PPV   | SN    | ACC   | Prec  | Rec   | F-measure | prec+ | rec+  | f-measure+ | MMR + f-measure+ | Composite Score (CS)<br>MMR + FRM + ACC + F-measure | CS Ranking |
|----------|-------------|------------|-------|-------|-------|-------|-------|-------|-------|-------|-----------|-------|-------|------------|------------------|-----------------------------------------------------|------------|
| Gavin    | MCL         | 100        | 0.252 | 0.457 | 0.527 | 0.427 | 0.939 | 0.634 | 0.790 | 0.333 | 0.469     | 0.720 | 0.247 | 0.368      | 0.620            | 1.811                                               | 13         |
|          | MCODE       | 87         | 0.209 | 0.333 | 0.490 | 0.562 | 0.654 | 0.606 | 0.770 | 0.265 | 0.394     | 0.701 | 0.210 | 0.323      | 0.532            | 1.543                                               | 17         |
|          | CFinder     | 103        | 0.245 | 0.443 | 0.465 | 0.485 | 0.816 | 0.629 | 0.806 | 0.337 | 0.475     | 0.718 | 0.254 | 0.376      | 0.620            | 1.792                                               | 14         |
|          | AP          | 131        | 0.242 | 0.436 | 0.400 | 0.305 | 0.719 | 0.468 | 0.603 | 0.323 | 0.421     | 0.489 | 0.220 | 0.303      | 0.545            | 1.567                                               | 16         |
|          | CMC         | 138        | 0.239 | 0.399 | 0.394 | 0.649 | 0.568 | 0.607 | 0.717 | 0.337 | 0.458     | 0.522 | 0.247 | 0.336      | 0.575            | 1.703                                               | 15         |
|          | ClusterOne  | 140        | 0.301 | 0.564 | 0.494 | 0.574 | 0.801 | 0.678 | 0.757 | 0.426 | 0.545     | 0.621 | 0.299 | 0.404      | 0.705            | 2.088                                               | 10         |
|          | PEWCC       | 257        | 0.291 | 0.457 | 0.293 | 0.565 | 0.710 | 0.633 | 0.712 | 0.357 | 0.476     | 0.315 | 0.278 | 0.296      | 0.586            | 1.857                                               | 12         |
|          | ProrankPlus | 395        | 0.363 | 0.553 | 0.265 | 0.523 | 0.808 | 0.650 | 0.770 | 0.457 | 0.574     | 0.273 | 0.371 | 0.315      | 0.678            | 2.140                                               | 9          |
|          | DPC-NADPIN  | 562        | 0.375 | 0.608 | 0.202 | 0.536 | 0.842 | 0.672 | 0.673 | 0.460 | 0.547     | 0.176 | 0.340 | 0.232      | 0.608            | 2.202                                               | 8          |
|          | Core&Peel   | 176        | 0.179 | 0.282 | 0.248 | 0.682 | 0.484 | 0.575 | 0.631 | 0.230 | 0.337     | 0.330 | 0.199 | 0.248      | 0.427            | 1.372                                               | 18         |
|          | IMHRC       | 123        | 0.267 | 0.553 | 0.491 | 0.537 | 0.843 | 0.673 | 0.691 | 0.357 | 0.471     | 0.593 | 0.251 | 0.353      | 0.620            | 1.964                                               | 11         |
|          | PC2P        | 154        | 0.367 | 0.632 | 0.598 | 0.614 | 0.831 | 0.714 | 0.792 | 0.491 | 0.607     | 0.695 | 0.368 | 0.481      | 0.848            | 2.320                                               | 6          |
|          | CC          | 215        | 0.429 | 0.718 | 0.589 | 0.679 | 0.681 | 0.680 | 0.688 | 0.591 | 0.636     | 0.595 | 0.440 | 0.506      | 0.935            | 2.463                                               | 2          |
|          | WCC         | 200        | 0.441 | 0.715 | 0.615 | 0.689 | 0.725 | 0.707 | 0.755 | 0.605 | 0.672     | 0.670 | 0.460 | 0.546      | 0.987            | 2.534                                               | 1          |
|          | OCC         | 463        | 0.434 | 0.677 | 0.306 | 0.567 | 0.869 | 0.702 | 0.540 | 0.526 | 0.533     | 0.268 | 0.426 | 0.329      | 0.763            | 2.346                                               | 5          |
|          | OWCC        | 463        | 0.462 | 0.749 | 0.313 | 0.557 | 0.881 | 0.701 | 0.521 | 0.557 | 0.538     | 0.268 | 0.426 | 0.329      | 0.791            | 2.450                                               | 3          |
|          | CUBCO       | 197        | 0.395 | 0.644 | 0.573 | 0.615 | 0.772 | 0.689 | 0.584 | 0.513 | 0.546     | 0.497 | 0.375 | 0.428      | 0.823            | 2.274                                               | 7          |
|          | CUBCO+      | 168        | 0.448 | 0.687 | 0.587 | 0.635 | 0.762 | 0.696 | 0.571 | 0.547 | 0.559     | 0.506 | 0.423 | 0.461      | 0.909            | 2.390                                               | 4          |

**SupplementaryTable 3.** Comparative analysis of eight algorithms for prediction of protein complexes with respect to twelve performance measures as well as two composite scores.

| Comparative analysis |             |            |       |       |       |       |       |       |       |       |           |       |       |            |                  |                                                     |            |
|----------------------|-------------|------------|-------|-------|-------|-------|-------|-------|-------|-------|-----------|-------|-------|------------|------------------|-----------------------------------------------------|------------|
| Data-set             | Method      | # Clusters | MMR   | FRM   | SEP   | PPV   | SN    | ACC   | Prec  | Rec   | F-measure | prec+ | rec+  | f-measure+ | MMR + f-measure+ | Composite Score (CS)<br>MMR + FRM + ACC + F-measure | CS Ranking |
| KroganCore           | MCL         | 126        | 0.277 | 0.387 | 0.510 | 0.388 | 0.926 | 0.600 | 0.849 | 0.338 | 0.484     | 0.786 | 0.286 | 0.419      | 0.696            | 1.747                                               | 11         |
|                      | MCODE       | 65         | 0.117 | 0.191 | 0.366 | 0.581 | 0.367 | 0.462 | 0.677 | 0.136 | 0.226     | 0.569 | 0.107 | 0.180      | 0.297            | 0.996                                               | 17         |
|                      | CFinder     | 87         | 0.176 | 0.289 | 0.388 | 0.494 | 0.643 | 0.564 | 0.828 | 0.228 | 0.358     | 0.759 | 0.191 | 0.305      | 0.481            | 1.386                                               | 15         |
|                      | AP          | 151        | 0.230 | 0.370 | 0.393 | 0.312 | 0.711 | 0.471 | 0.596 | 0.280 | 0.381     | 0.483 | 0.211 | 0.294      | 0.524            | 1.453                                               | 13         |
|                      | CMC         | 102        | 0.121 | 0.211 | 0.267 | 0.659 | 0.312 | 0.454 | 0.549 | 0.150 | 0.236     | 0.412 | 0.121 | 0.188      | 0.308            | 1.021                                               | 16         |
|                      | ClusterOne  | 189        | 0.315 | 0.540 | 0.470 | 0.619 | 0.748 | 0.680 | 0.762 | 0.425 | 0.546     | 0.556 | 0.303 | 0.393      | 0.708            | 2.081                                               | 7          |
|                      | PEWCC       | 246        | 0.192 | 0.329 | 0.235 | 0.531 | 0.529 | 0.530 | 0.707 | 0.251 | 0.371     | 0.371 | 0.197 | 0.230      | 0.422            | 1.423                                               | 14         |
|                      | ProrankPlus | 340        | 0.246 | 0.350 | 0.206 | 0.512 | 0.661 | 0.582 | 0.741 | 0.301 | 0.428     | 0.262 | 0.257 | 0.259      | 0.505            | 1.605                                               | 12         |
|                      | DPC-NADPIN  | 520        | 0.277 | 0.413 | 0.178 | 0.558 | 0.703 | 0.626 | 0.696 | 0.332 | 0.450     | 0.194 | 0.292 | 0.233      | 0.510            | 1.766                                               | 10         |
|                      | Core&Peel   | 144        | 0.085 | 0.150 | 0.143 | 0.652 | 0.252 | 0.405 | 0.472 | 0.101 | 0.167     | 0.201 | 0.084 | 0.118      | 0.204            | 0.807                                               | 18         |
|                      | IMHRC       | 155        | 0.257 | 0.509 | 0.460 | 0.548 | 0.791 | 0.658 | 0.690 | 0.315 | 0.433     | 0.542 | 0.243 | 0.335      | 0.592            | 1.856                                               | 9          |
|                      | PC2P        | 214        | 0.443 | 0.647 | 0.638 | 0.675 | 0.766 | 0.719 | 0.785 | 0.555 | 0.650     | 0.724 | 0.448 | 0.554      | 0.997            | 2.461                                               | 3          |
|                      | CC          | 279        | 0.466 | 0.728 | 0.611 | 0.732 | 0.582 | 0.653 | 0.649 | 0.601 | 0.624     | 0.573 | 0.462 | 0.512      | 0.978            | 2.471                                               | 1          |
|                      | WCC         | 275        | 0.457 | 0.717 | 0.603 | 0.733 | 0.588 | 0.657 | 0.665 | 0.613 | 0.638     | 0.564 | 0.448 | 0.499      | 0.957            | 2.469                                               | 2          |
|                      | OCC         | 479        | 0.454 | 0.697 | 0.321 | 0.542 | 0.839 | 0.674 | 0.537 | 0.552 | 0.544     | 0.324 | 0.448 | 0.376      | 0.830            | 2.369                                               | 5          |
|                      | OWCC        | 475        | 0.459 | 0.717 | 0.326 | 0.535 | 0.847 | 0.673 | 0.549 | 0.581 | 0.565     | 0.328 | 0.451 | 0.380      | 0.839            | 2.414                                               | 4          |
|                      | CUBCO       | 196        | 0.322 | 0.562 | 0.492 | 0.555 | 0.684 | 0.616 | 0.495 | 0.466 | 0.480     | 0.388 | 0.303 | 0.340      | 0.662            | 1.980                                               | 8          |
|                      | CUBCO+      | 203        | 0.365 | 0.636 | 0.485 | 0.614 | 0.709 | 0.660 | 0.399 | 0.495 | 0.442     | 0.300 | 0.332 | 0.315      | 0.680            | 2.102                                               | 6          |

| Data-set  | Method      | # Clusters | MMR   | FRM   | SEP   | PPV   | SN    | ACC   | Prec  | Rec   | F-measure | prec+ | rec+  | f-measure+ | MMR + f-measure+ | Composite Score (CS)<br>MMR + FRM + ACC + F-measure | CS Ranking |
|-----------|-------------|------------|-------|-------|-------|-------|-------|-------|-------|-------|-----------|-------|-------|------------|------------------|-----------------------------------------------------|------------|
| KroganExt | MCL         | 207        | 0.326 | 0.534 | 0.529 | 0.517 | 0.799 | 0.643 | 0.676 | 0.410 | 0.511     | 0.570 | 0.316 | 0.407      | 0.732            | 2.012                                               | 4          |
|           | MCODE       | 54         | 0.089 | 0.145 | 0.334 | 0.491 | 0.353 | 0.417 | 0.648 | 0.097 | 0.168     | 0.593 | 0.086 | 0.150      | 0.239            | 0.818                                               | 18         |
|           | CFinder     | 69         | 0.119 | 0.188 | 0.299 | 0.302 | 0.681 | 0.453 | 0.739 | 0.150 | 0.250     | 0.681 | 0.126 | 0.213      | 0.331            | 1.009                                               | 16         |
|           | AP          | 143        | 0.150 | 0.271 | 0.304 | 0.273 | 0.592 | 0.402 | 0.427 | 0.174 | 0.247     | 0.336 | 0.129 | 0.186      | 0.336            | 1.070                                               | 15         |
|           | CMC         | 125        | 0.135 | 0.231 | 0.280 | 0.616 | 0.351 | 0.465 | 0.624 | 0.182 | 0.282     | 0.440 | 0.147 | 0.221      | 0.355            | 1.112                                               | 14         |
|           | ClusterOne  | 144        | 0.222 | 0.378 | 0.419 | 0.610 | 0.591 | 0.600 | 0.792 | 0.311 | 0.447     | 0.646 | 0.249 | 0.360      | 0.582            | 1.647                                               | 9          |
|           | PEWCC       | 350        | 0.216 | 0.330 | 0.202 | 0.533 | 0.568 | 0.550 | 0.660 | 0.268 | 0.381     | 0.229 | 0.214 | 0.221      | 0.437            | 1.477                                               | 12         |
|           | ProrankPlus | 206        | 0.173 | 0.273 | 0.239 | 0.570 | 0.550 | 0.560 | 0.680 | 0.217 | 0.329     | 0.330 | 0.182 | 0.235      | 0.408            | 1.335                                               | 13         |
|           | DPC-NADPIN  | 546        | 0.235 | 0.367 | 0.146 | 0.509 | 0.701 | 0.597 | 0.658 | 0.273 | 0.386     | 0.154 | 0.225 | 0.183      | 0.417            | 1.586                                               | 11         |
|           | Core&Peel   | 185        | 0.097 | 0.164 | 0.144 | 0.589 | 0.290 | 0.413 | 0.535 | 0.123 | 0.200     | 0.222 | 0.110 | 0.147      | 0.244            | 0.874                                               | 17         |
|           | IMHRC       | 182        | 0.219 | 0.475 | 0.367 | 0.470 | 0.802 | 0.614 | 0.489 | 0.223 | 0.306     | 0.363 | 0.177 | 0.238      | 0.457            | 1.613                                               | 10         |
|           | PC2P        | 231        | 0.358 | 0.558 | 0.572 | 0.632 | 0.690 | 0.660 | 0.675 | 0.472 | 0.556     | 0.563 | 0.349 | 0.430      | 0.789            | 2.132                                               | 1          |
|           | CC          | 286        | 0.378 | 0.606 | 0.561 | 0.688 | 0.563 | 0.622 | 0.573 | 0.472 | 0.518     | 0.465 | 0.357 | 0.404      | 0.782            | 2.124                                               | 2          |
|           | WCC         | 273        | 0.369 | 0.582 | 0.569 | 0.691 | 0.572 | 0.629 | 0.586 | 0.464 | 0.518     | 0.480 | 0.351 | 0.406      | 0.775            | 2.098                                               | 3          |
|           | OCC         | 545        | 0.334 | 0.563 | 0.201 | 0.427 | 0.822 | 0.592 | 0.413 | 0.408 | 0.410     | 0.209 | 0.306 | 0.248      | 0.583            | 1.900                                               | 8          |
|           | OWCC        | 521        | 0.342 | 0.595 | 0.206 | 0.411 | 0.826 | 0.582 | 0.386 | 0.432 | 0.407     | 0.223 | 0.311 | 0.260      | 0.602            | 1.927                                               | 7          |
|           | CUBCO       | 267        | 0.329 | 0.598 | 0.474 | 0.621 | 0.630 | 0.625 | 0.352 | 0.462 | 0.400     | 0.262 | 0.279 | 0.270      | 0.599            | 1.952                                               | 5          |
|           | CUBCO+      | 373        | 0.371 | 0.680 | 0.452 | 0.713 | 0.502 | 0.598 | 0.201 | 0.481 | 0.284     | 0.121 | 0.249 | 0.162      | 0.533            | 1.932                                               | 6          |

**SupplementaryTable 3.** Comparative analysis of eight algorithms for prediction of protein complexes with respect to twelve performance measures as well as two composite scores.

| Comparative analysis |             |            |       |       |       |       |       |       |       |       |           |       |       |            |                  |                                                     |            |
|----------------------|-------------|------------|-------|-------|-------|-------|-------|-------|-------|-------|-----------|-------|-------|------------|------------------|-----------------------------------------------------|------------|
| Yeast - SGD          |             |            |       |       |       |       |       |       |       |       |           |       |       |            |                  |                                                     |            |
| Data-set             | Method      | # Clusters | MMR   | FRM   | SEP   | PPV   | SN    | ACC   | Prec  | Rec   | F-measure | prec+ | rec+  | f-measure+ | MMR + f-measure+ | Composite Score (CS)<br>MMR + FRM + ACC + F-measure | CS Ranking |
| Collins              | MCL         | 151        | 0.526 | 0.814 | 0.691 | 0.564 | 0.871 | 0.701 | 0.881 | 0.667 | 0.759     | 0.848 | 0.540 | 0.660      | 1.186            | 2.800                                               | 3          |
|                      | MCODE       | 85         | 0.276 | 0.456 | 0.515 | 0.543 | 0.634 | 0.587 | 0.800 | 0.350 | 0.487     | 0.800 | 0.287 | 0.422      | 0.698            | 1.806                                               | 15         |
|                      | CFinder     | 83         | 0.285 | 0.485 | 0.515 | 0.489 | 0.757 | 0.609 | 0.855 | 0.354 | 0.501     | 0.843 | 0.295 | 0.438      | 0.723            | 1.880                                               | 14         |
|                      | AP          | 152        | 0.491 | 0.730 | 0.531 | 0.453 | 0.689 | 0.558 | 0.822 | 0.599 | 0.693     | 0.776 | 0.498 | 0.607      | 1.098            | 2.473                                               | 9          |
|                      | CMC         | 74         | 0.213 | 0.367 | 0.379 | 0.526 | 0.538 | 0.532 | 0.851 | 0.300 | 0.443     | 0.757 | 0.236 | 0.360      | 0.573            | 1.555                                               | 17         |
|                      | ClusterOne  | 104        | 0.355 | 0.586 | 0.546 | 0.558 | 0.757 | 0.650 | 0.885 | 0.481 | 0.623     | 0.865 | 0.380 | 0.528      | 0.883            | 2.215                                               | 10         |
|                      | PEWCC       | 137        | 0.268 | 0.405 | 0.298 | 0.448 | 0.629 | 0.531 | 0.810 | 0.316 | 0.455     | 0.467 | 0.270 | 0.342      | 0.611            | 1.659                                               | 16         |
|                      | ProrankPlus | 314        | 0.427 | 0.578 | 0.281 | 0.448 | 0.758 | 0.583 | 0.803 | 0.485 | 0.605     | 0.322 | 0.426 | 0.367      | 0.794            | 2.193                                               | 11         |
|                      | DPC-NADPIN  | 318        | 0.424 | 0.582 | 0.266 | 0.427 | 0.783 | 0.578 | 0.777 | 0.460 | 0.578     | 0.318 | 0.426 | 0.364      | 0.788            | 2.162                                               | 13         |
|                      | Core&Peel   | 106        | 0.190 | 0.321 | 0.248 | 0.497 | 0.504 | 0.501 | 0.736 | 0.253 | 0.377     | 0.472 | 0.211 | 0.292      | 0.482            | 1.388                                               | 18         |
|                      | IMHRC       | 102        | 0.347 | 0.578 | 0.539 | 0.555 | 0.763 | 0.651 | 0.882 | 0.456 | 0.601     | 0.853 | 0.367 | 0.513      | 0.861            | 2.178                                               | 12         |
|                      | PC2P        | 153        | 0.529 | 0.814 | 0.690 | 0.580 | 0.841 | 0.698 | 0.869 | 0.671 | 0.757     | 0.843 | 0.544 | 0.662      | 1.191            | 2.799                                               | 4          |
|                      | CC          | 188        | 0.577 | 0.827 | 0.679 | 0.645 | 0.706 | 0.675 | 0.809 | 0.734 | 0.770     | 0.745 | 0.591 | 0.659      | 1.236            | 2.848                                               | 2          |
|                      | WCC         | 186        | 0.585 | 0.844 | 0.687 | 0.649 | 0.745 | 0.695 | 0.823 | 0.743 | 0.781     | 0.758 | 0.595 | 0.667      | 1.251            | 2.904                                               | 1          |
|                      | OCC         | 370        | 0.620 | 0.827 | 0.431 | 0.490 | 0.871 | 0.653 | 0.649 | 0.730 | 0.687     | 0.403 | 0.629 | 0.491      | 1.110            | 2.787                                               | 5          |
|                      | OWCC        | 372        | 0.614 | 0.840 | 0.430 | 0.486 | 0.869 | 0.650 | 0.634 | 0.734 | 0.681     | 0.392 | 0.616 | 0.479      | 1.094            | 2.784                                               | 6          |
| CUBCO                | 155         | 0.484      | 0.755 | 0.661 | 0.571 | 0.754 | 0.656 | 0.787 | 0.603 | 0.683 | 0.735     | 0.481 | 0.582 | 1.066      | 2.579            | 7                                                   |            |
| CUBCO+               | 151         | 0.465      | 0.766 | 0.617 | 0.584 | 0.661 | 0.622 | 0.775 | 0.636 | 0.698 | 0.629     | 0.444 | 0.521 | 0.985      | 2.551            | 8                                                   |            |

| Data-set | Method      | # Clusters | MMR   | FRM   | SEP   | PPV   | SN    | ACC   | Prec  | Rec   | F-measure | prec+ | rec+  | f-measure+ | MMR + f-measure+ | Composite Score (CS)<br>MMR + FRM + ACC + F-measure | CS Ranking |
|----------|-------------|------------|-------|-------|-------|-------|-------|-------|-------|-------|-----------|-------|-------|------------|------------------|-----------------------------------------------------|------------|
| Gavin    | MCL         | 78         | 0.240 | 0.433 | 0.499 | 0.347 | 0.920 | 0.565 | 0.821 | 0.317 | 0.457     | 0.756 | 0.246 | 0.371      | 0.611            | 1.696                                               | 14         |
|          | MCODE       | 77         | 0.230 | 0.413 | 0.474 | 0.507 | 0.650 | 0.574 | 0.779 | 0.279 | 0.411     | 0.714 | 0.229 | 0.347      | 0.577            | 1.628                                               | 16         |
|          | CFinder     | 83         | 0.253 | 0.475 | 0.472 | 0.442 | 0.807 | 0.597 | 0.795 | 0.317 | 0.453     | 0.771 | 0.267 | 0.396      | 0.649            | 1.778                                               | 13         |
|          | AP          | 115        | 0.256 | 0.463 | 0.379 | 0.322 | 0.630 | 0.451 | 0.565 | 0.308 | 0.399     | 0.487 | 0.233 | 0.315      | 0.571            | 1.568                                               | 17         |
|          | CMC         | 107        | 0.236 | 0.417 | 0.381 | 0.540 | 0.560 | 0.550 | 0.673 | 0.317 | 0.431     | 0.533 | 0.238 | 0.329      | 0.565            | 1.633                                               | 15         |
|          | ClusterOne  | 109        | 0.305 | 0.613 | 0.502 | 0.516 | 0.808 | 0.646 | 0.780 | 0.425 | 0.550     | 0.716 | 0.325 | 0.447      | 0.752            | 2.113                                               | 8          |
|          | PEWCC       | 175        | 0.289 | 0.471 | 0.312 | 0.463 | 0.700 | 0.570 | 0.731 | 0.367 | 0.488     | 0.400 | 0.292 | 0.337      | 0.627            | 1.818                                               | 12         |
|          | ProrankPlus | 290        | 0.367 | 0.567 | 0.278 | 0.460 | 0.796 | 0.605 | 0.759 | 0.425 | 0.545     | 0.310 | 0.375 | 0.340      | 0.707            | 2.084                                               | 10         |
|          | DPC-NADPIN  | 422        | 0.384 | 0.600 | 0.202 | 0.433 | 0.827 | 0.598 | 0.682 | 0.429 | 0.527     | 0.223 | 0.392 | 0.284      | 0.668            | 2.109                                               | 9          |
|          | Core&Peel   | 132        | 0.195 | 0.333 | 0.250 | 0.513 | 0.492 | 0.502 | 0.621 | 0.238 | 0.344     | 0.364 | 0.200 | 0.258      | 0.453            | 1.374                                               | 18         |
|          | IMHRC       | 102        | 0.283 | 0.588 | 0.488 | 0.489 | 0.808 | 0.628 | 0.775 | 0.396 | 0.524     | 0.686 | 0.292 | 0.409      | 0.692            | 2.022                                               | 11         |
|          | PC2P        | 126        | 0.379 | 0.683 | 0.586 | 0.565 | 0.809 | 0.676 | 0.817 | 0.521 | 0.636     | 0.754 | 0.396 | 0.519      | 0.898            | 2.375                                               | 6          |
|          | CC          | 164        | 0.426 | 0.721 | 0.574 | 0.597 | 0.675 | 0.635 | 0.677 | 0.542 | 0.602     | 0.598 | 0.408 | 0.485      | 0.911            | 2.383                                               | 5          |
|          | WCC         | 157        | 0.432 | 0.717 | 0.587 | 0.604 | 0.708 | 0.654 | 0.745 | 0.571 | 0.646     | 0.662 | 0.433 | 0.524      | 0.956            | 2.448                                               | 2          |
|          | OCC         | 353        | 0.459 | 0.704 | 0.319 | 0.478 | 0.840 | 0.634 | 0.558 | 0.558 | 0.558     | 0.300 | 0.442 | 0.358      | 0.817            | 2.355                                               | 7          |
|          | OWCC        | 349        | 0.482 | 0.792 | 0.326 | 0.463 | 0.857 | 0.630 | 0.559 | 0.613 | 0.584     | 0.309 | 0.450 | 0.367      | 0.848            | 2.488                                               | 1          |
| CUBCO    | 148         | 0.420      | 0.737 | 0.580 | 0.548 | 0.808 | 0.665 | 0.669 | 0.584 | 0.623 | 0.588     | 0.416 | 0.487 | 0.908      | 2.446            | 3                                                   |            |
| CUBCO+   | 136         | 0.437      | 0.701 | 0.574 | 0.590 | 0.773 | 0.675 | 0.647 | 0.576 | 0.610 | 0.581     | 0.446 | 0.505 | 0.942      | 2.423            | 4                                                   |            |

**SupplementaryTable 3.** Comparative analysis of eight algorithms for prediction of protein complexes with respect to twelve performance measures as well as two composite scores.

| Comparative analysis |             |            |       |       |       |       |       |       |       |       |           |       |       |            |                  |                                                     |            |
|----------------------|-------------|------------|-------|-------|-------|-------|-------|-------|-------|-------|-----------|-------|-------|------------|------------------|-----------------------------------------------------|------------|
| Data-set             | Method      | # Clusters | MMR   | FRM   | SEP   | PPV   | SN    | ACC   | Prec  | Rec   | F-measure | prec+ | rec+  | f-measure+ | MMR + f-measure+ | Composite Score (CS)<br>MMR + FRM + ACC + F-measure | CS Ranking |
| KroganCore           | MCL         | 102        | 0.300 | 0.432 | 0.498 | 0.352 | 0.840 | 0.544 | 0.824 | 0.352 | 0.493     | 0.775 | 0.299 | 0.432      | 0.732            | 1.769                                               | 11         |
|                      | MCODE       | 54         | 0.132 | 0.250 | 0.374 | 0.469 | 0.388 | 0.427 | 0.685 | 0.163 | 0.263     | 0.611 | 0.125 | 0.208      | 0.340            | 1.072                                               | 17         |
|                      | CFinder     | 73         | 0.202 | 0.337 | 0.406 | 0.426 | 0.630 | 0.518 | 0.877 | 0.269 | 0.412     | 0.795 | 0.220 | 0.344      | 0.546            | 1.469                                               | 15         |
|                      | AP          | 136        | 0.289 | 0.466 | 0.377 | 0.271 | 0.701 | 0.436 | 0.588 | 0.330 | 0.422     | 0.522 | 0.269 | 0.355      | 0.644            | 1.613                                               | 13         |
|                      | CMC         | 81         | 0.136 | 0.265 | 0.280 | 0.552 | 0.337 | 0.431 | 0.605 | 0.174 | 0.271     | 0.506 | 0.155 | 0.238      | 0.373            | 1.103                                               | 16         |
|                      | ClusterOne  | 137        | 0.339 | 0.530 | 0.484 | 0.520 | 0.702 | 0.604 | 0.796 | 0.447 | 0.572     | 0.664 | 0.345 | 0.454      | 0.792            | 2.045                                               | 8          |
|                      | PEWCC       | 177        | 0.221 | 0.345 | 0.257 | 0.464 | 0.527 | 0.494 | 0.802 | 0.288 | 0.424     | 0.362 | 0.242 | 0.290      | 0.511            | 1.484                                               | 14         |
|                      | ProrankPlus | 297        | 0.288 | 0.409 | 0.213 | 0.424 | 0.639 | 0.521 | 0.717 | 0.356 | 0.476     | 0.269 | 0.303 | 0.285      | 0.573            | 1.694                                               | 12         |
|                      | DPC-NADPIN  | 438        | 0.312 | 0.439 | 0.179 | 0.451 | 0.674 | 0.551 | 0.721 | 0.367 | 0.487     | 0.189 | 0.314 | 0.236      | 0.548            | 1.789                                               | 10         |
|                      | Core&Peel   | 130        | 0.108 | 0.201 | 0.143 | 0.503 | 0.288 | 0.381 | 0.477 | 0.133 | 0.207     | 0.231 | 0.114 | 0.152      | 0.261            | 0.897                                               | 18         |
|                      | IMHRC       | 118        | 0.286 | 0.530 | 0.468 | 0.503 | 0.733 | 0.607 | 0.763 | 0.364 | 0.492     | 0.627 | 0.280 | 0.387      | 0.673            | 1.916                                               | 9          |
|                      | PC2P        | 166        | 0.444 | 0.663 | 0.601 | 0.574 | 0.721 | 0.643 | 0.807 | 0.576 | 0.672     | 0.729 | 0.458 | 0.563      | 1.007            | 2.422                                               | 1          |
|                      | CC          | 220        | 0.456 | 0.689 | 0.584 | 0.625 | 0.526 | 0.573 | 0.636 | 0.572 | 0.602     | 0.523 | 0.436 | 0.475      | 0.931            | 2.321                                               | 5          |
|                      | WCC         | 219        | 0.459 | 0.693 | 0.587 | 0.632 | 0.539 | 0.583 | 0.639 | 0.572 | 0.604     | 0.525 | 0.436 | 0.476      | 0.935            | 2.339                                               | 4          |
|                      | OCC         | 389        | 0.494 | 0.735 | 0.315 | 0.448 | 0.758 | 0.583 | 0.558 | 0.598 | 0.577     | 0.326 | 0.481 | 0.389      | 0.883            | 2.390                                               | 3          |
|                      | OWCC        | 388        | 0.500 | 0.735 | 0.318 | 0.448 | 0.766 | 0.586 | 0.559 | 0.610 | 0.583     | 0.343 | 0.504 | 0.408      | 0.907            | 2.404                                               | 2          |
|                      | CUBCO       | 214        | 0.413 | 0.704 | 0.527 | 0.595 | 0.658 | 0.625 | 0.467 | 0.563 | 0.511     | 0.336 | 0.362 | 0.349      | 0.762            | 2.253                                               | 6          |
| CUBCO+               | 201         | 0.420      | 0.722 | 0.484 | 0.585 | 0.711 | 0.645 | 0.403 | 0.549 | 0.465 | 0.313     | 0.389 | 0.347 | 0.767      | 2.252            | 7                                                   |            |

| Data-set  | Method      | # Clusters | MMR   | FRM   | SEP   | PPV   | SN    | ACC   | Prec  | Rec   | F-measure | prec+ | rec+  | f-measure+ | MMR + f-measure+ | Composite Score (CS)<br>MMR + FRM + ACC + F-measure | CS Ranking |
|-----------|-------------|------------|-------|-------|-------|-------|-------|-------|-------|-------|-----------|-------|-------|------------|------------------|-----------------------------------------------------|------------|
| KroganExt | MCL         | 33         | 0.083 | 0.117 | 0.250 | 0.098 | 0.960 | 0.307 | 0.667 | 0.089 | 0.156     | 0.606 | 0.071 | 0.127      | 0.210            | 0.664                                               | 18         |
|           | MCODE       | 39         | 0.084 | 0.128 | 0.317 | 0.339 | 0.375 | 0.356 | 0.692 | 0.103 | 0.179     | 0.667 | 0.092 | 0.162      | 0.246            | 0.747                                               | 17         |
|           | CFinder     | 57         | 0.133 | 0.220 | 0.309 | 0.256 | 0.638 | 0.404 | 0.789 | 0.170 | 0.280     | 0.684 | 0.138 | 0.230      | 0.363            | 1.037                                               | 15         |
|           | AP          | 131        | 0.174 | 0.309 | 0.300 | 0.263 | 0.539 | 0.377 | 0.397 | 0.199 | 0.265     | 0.344 | 0.160 | 0.218      | 0.392            | 1.124                                               | 14         |
|           | CMC         | 97         | 0.158 | 0.280 | 0.295 | 0.520 | 0.362 | 0.433 | 0.629 | 0.213 | 0.318     | 0.485 | 0.167 | 0.248      | 0.406            | 1.190                                               | 13         |
|           | ClusterOne  | 116        | 0.263 | 0.411 | 0.442 | 0.533 | 0.568 | 0.551 | 0.862 | 0.344 | 0.492     | 0.724 | 0.298 | 0.422      | 0.685            | 1.716                                               | 8          |
|           | PEWCC       | 248        | 0.234 | 0.358 | 0.204 | 0.433 | 0.521 | 0.475 | 0.718 | 0.291 | 0.414     | 0.278 | 0.245 | 0.260      | 0.494            | 1.481                                               | 11         |
|           | ProrankPlus | 185        | 0.216 | 0.323 | 0.254 | 0.456 | 0.529 | 0.491 | 0.692 | 0.270 | 0.388     | 0.351 | 0.230 | 0.278      | 0.495            | 1.418                                               | 12         |
|           | DPC-NADPIN  | 472        | 0.267 | 0.401 | 0.144 | 0.412 | 0.650 | 0.517 | 0.627 | 0.316 | 0.420     | 0.155 | 0.259 | 0.194      | 0.461            | 1.605                                               | 10         |
|           | Core&Peel   | 149        | 0.119 | 0.209 | 0.156 | 0.497 | 0.310 | 0.393 | 0.510 | 0.149 | 0.231     | 0.242 | 0.128 | 0.167      | 0.286            | 0.952                                               | 16         |
|           | IMHRC       | 146        | 0.246 | 0.475 | 0.368 | 0.422 | 0.702 | 0.545 | 0.568 | 0.298 | 0.391     | 0.445 | 0.230 | 0.304      | 0.550            | 1.657                                               | 9          |
|           | PC2P        | 179        | 0.380 | 0.571 | 0.550 | 0.538 | 0.646 | 0.589 | 0.670 | 0.475 | 0.556     | 0.592 | 0.376 | 0.460      | 0.840            | 2.096                                               | 2          |
|           | CC          | 232        | 0.388 | 0.617 | 0.525 | 0.585 | 0.505 | 0.543 | 0.539 | 0.479 | 0.507     | 0.470 | 0.387 | 0.424      | 0.812            | 2.055                                               | 3          |
|           | WCC         | 224        | 0.394 | 0.621 | 0.544 | 0.599 | 0.523 | 0.560 | 0.580 | 0.500 | 0.537     | 0.482 | 0.383 | 0.427      | 0.821            | 2.112                                               | 1          |
|           | OCC         | 445        | 0.376 | 0.596 | 0.199 | 0.358 | 0.730 | 0.511 | 0.391 | 0.436 | 0.412     | 0.225 | 0.355 | 0.275      | 0.651            | 1.896                                               | 5          |
|           | OWCC        | 421        | 0.397 | 0.635 | 0.213 | 0.354 | 0.735 | 0.510 | 0.390 | 0.472 | 0.427     | 0.245 | 0.365 | 0.293      | 0.690            | 1.969                                               | 4          |
|           | CUBCO       | 322        | 0.355 | 0.653 | 0.443 | 0.590 | 0.544 | 0.567 | 0.248 | 0.452 | 0.321     | 0.149 | 0.241 | 0.184      | 0.539            | 1.896                                               | 6          |
| CUBCO+    | 294         | 0.349      | 0.627 | 0.433 | 0.607 | 0.515 | 0.559 | 0.204 | 0.411 | 0.273 | 0.136     | 0.253 | 0.177 | 0.526      | 1.807            | 7                                                   |            |

**SupplementaryTable 3.** Comparative analysis of eight algorithms for prediction of protein complexes with respect to twelve performance measures as well as two composite scores.

| Comparative analysis |             |            |       |       |       |       |       |       |       |       |           |       |       |            |                  |                                                     |            |
|----------------------|-------------|------------|-------|-------|-------|-------|-------|-------|-------|-------|-----------|-------|-------|------------|------------------|-----------------------------------------------------|------------|
| Human - Corum        |             |            |       |       |       |       |       |       |       |       |           |       |       |            |                  |                                                     |            |
| Data-set             | Method      | # Clusters | MMR   | FRM   | SEP   | PPV   | SN    | ACC   | Prec  | Rec   | F-measure | prec+ | rec+  | f-measure+ | MMR + f-measure+ | Composite Score (CS)<br>MMR + FRM + ACC + F-measure | CS Ranking |
| STRING               | MCL         | 352        | 0.085 | 0.585 | 0.239 | 0.136 | 0.793 | 0.329 | 0.821 | 0.385 | 0.524     | 0.685 | 0.081 | 0.145      | 0.230            | 1.523                                               | 5          |
|                      | MCODE       | 114        | 0.026 | 0.201 | 0.157 | 0.145 | 0.379 | 0.234 | 0.763 | 0.121 | 0.209     | 0.728 | 0.028 | 0.054      | 0.080            | 0.669                                               | 16         |
|                      | CFinder     | 119        | 0.030 | 0.266 | 0.160 | 0.125 | 0.570 | 0.267 | 0.866 | 0.147 | 0.252     | 0.807 | 0.032 | 0.062      | 0.092            | 0.814                                               | 14         |
|                      | AP          | 327        | 0.071 | 0.468 | 0.188 | 0.091 | 0.737 | 0.259 | 0.740 | 0.316 | 0.443     | 0.618 | 0.068 | 0.122      | 0.194            | 1.241                                               | 7          |
|                      | CMC         | 132        | 0.023 | 0.134 | 0.094 | 0.148 | 0.284 | 0.205 | 0.636 | 0.090 | 0.157     | 0.523 | 0.023 | 0.044      | 0.067            | 0.519                                               | 17         |
|                      | ClusterOne  | 243        | 0.054 | 0.422 | 0.183 | 0.129 | 0.652 | 0.289 | 0.794 | 0.237 | 0.365     | 0.646 | 0.053 | 0.098      | 0.151            | 1.131                                               | 8          |
|                      | PEWCC       | 338        | 0.046 | 0.252 | 0.086 | 0.123 | 0.526 | 0.255 | 0.586 | 0.148 | 0.237     | 0.391 | 0.044 | 0.080      | 0.126            | 0.790                                               | 15         |
|                      | ProrankPlus | 587        | 0.084 | 0.352 | 0.081 | 0.141 | 0.580 | 0.286 | 0.714 | 0.238 | 0.357     | 0.443 | 0.087 | 0.146      | 0.230            | 1.078                                               | 11         |
|                      | DPC-NADPIN  | 721        | 0.090 | 0.343 | 0.070 | 0.143 | 0.613 | 0.296 | 0.678 | 0.236 | 0.350     | 0.383 | 0.093 | 0.149      | 0.239            | 1.080                                               | 10         |
|                      | Core&Peel   | 206        | 0.026 | 0.092 | 0.049 | 0.143 | 0.242 | 0.186 | 0.515 | 0.060 | 0.108     | 0.374 | 0.026 | 0.048      | 0.074            | 0.412                                               | 18         |
|                      | IMHRC       | 210        | 0.048 | 0.401 | 0.190 | 0.127 | 0.732 | 0.305 | 0.762 | 0.198 | 0.315     | 0.657 | 0.046 | 0.087      | 0.134            | 1.068                                               | 12         |
|                      | PC2P        | 347        | 0.081 | 0.562 | 0.236 | 0.137 | 0.751 | 0.320 | 0.807 | 0.384 | 0.520     | 0.674 | 0.079 | 0.141      | 0.222            | 1.483                                               | 6          |
|                      | CC          | 443        | 0.093 | 0.611 | 0.236 | 0.147 | 0.555 | 0.286 | 0.729 | 0.452 | 0.558     | 0.585 | 0.087 | 0.151      | 0.244            | 1.548                                               | 3          |
|                      | WCC         | 443        | 0.093 | 0.611 | 0.236 | 0.147 | 0.555 | 0.286 | 0.731 | 0.450 | 0.558     | 0.582 | 0.087 | 0.151      | 0.244            | 1.547                                               | 4          |
|                      | OCC         | 738        | 0.122 | 0.665 | 0.158 | 0.151 | 0.786 | 0.344 | 0.654 | 0.459 | 0.539     | 0.470 | 0.117 | 0.187      | 0.309            | 1.671                                               | 1          |
|                      | OWCC        | 737        | 0.121 | 0.657 | 0.158 | 0.151 | 0.786 | 0.345 | 0.655 | 0.455 | 0.537     | 0.461 | 0.114 | 0.183      | 0.304            | 1.659                                               | 2          |
| CUBCO                | 371         | 0.038      | 0.400 | 0.149 | 0.099 | 0.737 | 0.270 | 0.251 | 0.279 | 0.264 | 0.097     | 0.020 | 0.033 | 0.071      | 0.973            | 13                                                  |            |
| CUBCO+               | 275         | 0.040      | 0.490 | 0.147 | 0.108 | 0.814 | 0.296 | 0.222 | 0.316 | 0.261 | 0.127     | 0.028 | 0.045 | 0.085      | 1.086            | 9                                                   |            |
| Data-set             | Method      | # Clusters | MMR   | FRM   | SEP   | PPV   | SN    | ACC   | Prec  | Rec   | F-measure | prec+ | rec+  | f-measure+ | MMR + f-measure+ | Composite Score (CS)<br>MMR + FRM + ACC + F-measure | CS Ranking |
| PIPS                 | MCL         | 50         | 0.013 | 0.091 | 0.113 | 0.032 | 0.937 | 0.172 | 0.720 | 0.074 | 0.134     | 0.520 | 0.011 | 0.021      | 0.034            | 0.410                                               | 13         |
|                      | MCODE       | 32         | 0.006 | 0.059 | 0.106 | 0.069 | 0.292 | 0.142 | 0.406 | 0.015 | 0.029     | 0.281 | 0.004 | 0.007      | 0.013            | 0.236                                               | 18         |
|                      | CFinder     | 36         | 0.008 | 0.062 | 0.091 | 0.043 | 0.621 | 0.164 | 0.556 | 0.023 | 0.044     | 0.417 | 0.006 | 0.012      | 0.020            | 0.277                                               | 16         |
|                      | AP          | 116        | 0.022 | 0.181 | 0.128 | 0.052 | 0.671 | 0.188 | 0.509 | 0.109 | 0.179     | 0.302 | 0.015 | 0.028      | 0.050            | 0.570                                               | 9          |
|                      | CMC         | 68         | 0.009 | 0.105 | 0.077 | 0.057 | 0.359 | 0.143 | 0.338 | 0.065 | 0.110     | 0.235 | 0.007 | 0.013      | 0.023            | 0.367                                               | 14         |
|                      | ClusterOne  | 83         | 0.015 | 0.131 | 0.125 | 0.075 | 0.476 | 0.189 | 0.386 | 0.049 | 0.086     | 0.301 | 0.010 | 0.020      | 0.035            | 0.422                                               | 11         |
|                      | PEWCC       | 204        | 0.019 | 0.134 | 0.046 | 0.029 | 0.511 | 0.122 | 0.221 | 0.057 | 0.091     | 0.142 | 0.012 | 0.022      | 0.041            | 0.366                                               | 15         |
|                      | ProrankPlus | 212        | 0.030 | 0.235 | 0.060 | 0.055 | 0.568 | 0.176 | 0.396 | 0.097 | 0.156     | 0.250 | 0.022 | 0.041      | 0.071            | 0.597                                               | 8          |
|                      | DPC-NADPIN  | 364        | 0.036 | 0.182 | 0.049 | 0.044 | 0.677 | 0.172 | 0.250 | 0.072 | 0.111     | 0.148 | 0.023 | 0.039      | 0.075            | 0.502                                               | 10         |
|                      | Core&Peel   | 123        | 0.010 | 0.064 | 0.047 | 0.059 | 0.300 | 0.133 | 0.203 | 0.027 | 0.047     | 0.138 | 0.007 | 0.014      | 0.024            | 0.254                                               | 17         |
|                      | IMHRC       | 96         | 0.016 | 0.104 | 0.127 | 0.062 | 0.699 | 0.208 | 0.354 | 0.052 | 0.090     | 0.292 | 0.012 | 0.023      | 0.038            | 0.418                                               | 12         |
|                      | PC2P        | 133        | 0.028 | 0.235 | 0.168 | 0.078 | 0.644 | 0.224 | 0.556 | 0.132 | 0.214     | 0.301 | 0.017 | 0.032      | 0.059            | 0.700                                               | 6          |
|                      | CC          | 181        | 0.037 | 0.355 | 0.186 | 0.098 | 0.510 | 0.224 | 0.630 | 0.193 | 0.296     | 0.293 | 0.022 | 0.041      | 0.078            | 0.911                                               | 2          |
|                      | WCC         | 146        | 0.032 | 0.275 | 0.173 | 0.083 | 0.582 | 0.220 | 0.651 | 0.196 | 0.301     | 0.336 | 0.021 | 0.039      | 0.071            | 0.828                                               | 3          |
|                      | OCC         | 314        | 0.040 | 0.275 | 0.088 | 0.044 | 0.793 | 0.186 | 0.347 | 0.150 | 0.209     | 0.169 | 0.022 | 0.039      | 0.079            | 0.710                                               | 5          |
|                      | OWCC        | 266        | 0.038 | 0.282 | 0.095 | 0.042 | 0.812 | 0.184 | 0.410 | 0.180 | 0.250     | 0.184 | 0.021 | 0.037      | 0.075            | 0.754                                               | 4          |
| CUBCO                | 216         | 0.044      | 0.381 | 0.186 | 0.088 | 0.542 | 0.219 | 0.694 | 0.321 | 0.439 | 0.227     | 0.021 | 0.038 | 0.082      | 1.083            | 1                                                   |            |
| CUBCO+               | 111         | 0.025      | 0.197 | 0.160 | 0.071 | 0.680 | 0.219 | 0.604 | 0.140 | 0.228 | 0.288     | 0.014 | 0.028 | 0.052      | 0.669            | 7                                                   |            |

**SupplementaryTable 3.** Comparative analysis of eight algorithms for prediction of protein complexes with respect to twelve performance measures as well as two composite scores.

| Comparative analysis |             |            |       |       |       |       |       |       |       |       |           |       |       |            |                  |                                                     |            |
|----------------------|-------------|------------|-------|-------|-------|-------|-------|-------|-------|-------|-----------|-------|-------|------------|------------------|-----------------------------------------------------|------------|
| E.coli - Ecocyc      |             |            |       |       |       |       |       |       |       |       |           |       |       |            |                  |                                                     |            |
| Data-set             | Method      | # Clusters | MMR   | FRM   | SEP   | PPV   | SN    | ACC   | Prec  | Rec   | F-measure | prec+ | rec+  | f-measure+ | MMR + f-measure+ | Composite Score (CS)<br>MMR + FRM + ACC + F-measure | CS Ranking |
| Babu                 | MCL         | 71         | 0.126 | 0.294 | 0.378 | 0.284 | 0.687 | 0.442 | 0.423 | 0.165 | 0.237     | 0.254 | 0.083 | 0.125      | 0.251            | 1.099                                               | 6          |
|                      | MCODE       | 16         | 0.027 | 0.055 | 0.224 | 0.197 | 0.294 | 0.241 | 0.375 | 0.041 | 0.074     | 0.313 | 0.023 | 0.043      | 0.070            | 0.397                                               | 17         |
|                      | CFinder     | 29         | 0.054 | 0.115 | 0.225 | 0.161 | 0.678 | 0.330 | 0.552 | 0.087 | 0.151     | 0.345 | 0.046 | 0.081      | 0.135            | 0.649                                               | 15         |
|                      | AP          | 37         | 0.066 | 0.151 | 0.300 | 0.175 | 0.759 | 0.364 | 0.432 | 0.092 | 0.151     | 0.270 | 0.046 | 0.078      | 0.144            | 0.733                                               | 13         |
|                      | CMC         | 24         | 0.033 | 0.133 | 0.172 | 0.221 | 0.366 | 0.284 | 0.208 | 0.037 | 0.062     | 0.167 | 0.018 | 0.033      | 0.066            | 0.513                                               | 16         |
|                      | ClusterOne  | 30         | 0.057 | 0.110 | 0.239 | 0.537 | 0.205 | 0.332 | 0.633 | 0.092 | 0.160     | 0.433 | 0.060 | 0.105      | 0.162            | 0.659                                               | 14         |
|                      | PEWCC       | 158        | 0.092 | 0.239 | 0.124 | 0.191 | 0.545 | 0.323 | 0.196 | 0.124 | 0.152     | 0.089 | 0.064 | 0.074      | 0.166            | 0.805                                               | 11         |
|                      | ProrankPlus | 33         | 0.076 | 0.142 | 0.284 | 0.391 | 0.282 | 0.332 | 0.758 | 0.115 | 0.199     | 0.485 | 0.073 | 0.127      | 0.203            | 0.749                                               | 12         |
|                      | DPCNADPIN   | 109        | 0.111 | 0.229 | 0.184 | 0.253 | 0.589 | 0.386 | 0.358 | 0.133 | 0.194     | 0.147 | 0.073 | 0.098      | 0.209            | 0.921                                               | 10         |
|                      | Core&Peel   | 52         | 0.021 | 0.050 | 0.079 | 0.330 | 0.163 | 0.232 | 0.038 | 0.009 | 0.015     | 0.038 | 0.009 | 0.015      | 0.036            | 0.318                                               | 18         |
|                      | IMHRC       | 84         | 0.120 | 0.275 | 0.278 | 0.323 | 0.589 | 0.436 | 0.393 | 0.147 | 0.214     | 0.190 | 0.073 | 0.106      | 0.226            | 1.046                                               | 8          |
|                      | PC2P        | 89         | 0.182 | 0.362 | 0.441 | 0.372 | 0.634 | 0.486 | 0.506 | 0.243 | 0.328     | 0.292 | 0.119 | 0.169      | 0.352            | 1.359                                               | 5          |
|                      | CC          | 107        | 0.207 | 0.399 | 0.470 | 0.424 | 0.590 | 0.501 | 0.495 | 0.298 | 0.372     | 0.308 | 0.151 | 0.203      | 0.410            | 1.479                                               | 4          |
|                      | WCC         | 106        | 0.209 | 0.408 | 0.472 | 0.428 | 0.589 | 0.502 | 0.509 | 0.307 | 0.383     | 0.321 | 0.156 | 0.210      | 0.419            | 1.502                                               | 3          |
|                      | OCC         | 193        | 0.165 | 0.372 | 0.159 | 0.161 | 0.808 | 0.361 | 0.176 | 0.193 | 0.184     | 0.093 | 0.083 | 0.088      | 0.252            | 1.081                                               | 7          |
|                      | OWCC        | 189        | 0.160 | 0.344 | 0.159 | 0.161 | 0.821 | 0.363 | 0.148 | 0.161 | 0.154     | 0.079 | 0.069 | 0.074      | 0.233            | 1.021                                               | 9          |
| CUBCO                | 137         | 0.228      | 0.431 | 0.468 | 0.435 | 0.541 | 0.485 | 0.453 | 0.344 | 0.391 | 0.190     | 0.119 | 0.146 | 0.374      | 1.535            | 1                                                   |            |
| CUBCO+               | 140         | 0.226      | 0.451 | 0.465 | 0.426 | 0.530 | 0.475 | 0.407 | 0.324 | 0.361 | 0.186     | 0.122 | 0.147 | 0.373      | 1.512            | 2                                                   |            |
| Cong                 | MCL         | 118        | 0.405 | 0.627 | 0.667 | 0.500 | 0.969 | 0.696 | 0.864 | 0.490 | 0.625     | 0.814 | 0.398 | 0.535      | 0.940            | 2.353                                               | 7          |
|                      | MCODE       | 31         | 0.102 | 0.199 | 0.359 | 0.621 | 0.240 | 0.386 | 0.968 | 0.187 | 0.313     | 0.774 | 0.100 | 0.176      | 0.278            | 1.000                                               | 10         |
|                      | CFinder     | 27         | 0.093 | 0.170 | 0.334 | 0.605 | 0.232 | 0.375 | 0.963 | 0.158 | 0.271     | 0.889 | 0.100 | 0.179      | 0.272            | 0.908                                               | 13         |
|                      | AP          | 138        | 0.466 | 0.726 | 0.700 | 0.587 | 0.911 | 0.731 | 0.899 | 0.589 | 0.712     | 0.826 | 0.473 | 0.602      | 1.067            | 2.635                                               | 4          |
|                      | CMC         | 34         | 0.092 | 0.170 | 0.304 | 0.611 | 0.185 | 0.336 | 0.765 | 0.149 | 0.250     | 0.676 | 0.095 | 0.167      | 0.259            | 0.848                                               | 16         |
|                      | ClusterOne  | 117        | 0.315 | 0.581 | 0.504 | 0.569 | 0.659 | 0.613 | 0.829 | 0.477 | 0.606     | 0.641 | 0.311 | 0.419      | 0.734            | 2.114                                               | 8          |
|                      | PEWCC       | 41         | 0.078 | 0.203 | 0.251 | 0.443 | 0.271 | 0.346 | 0.683 | 0.170 | 0.272     | 0.415 | 0.071 | 0.121      | 0.199            | 0.900                                               | 14         |
|                      | ProrankPlus | 39         | 0.104 | 0.191 | 0.282 | 0.529 | 0.234 | 0.352 | 0.897 | 0.166 | 0.280     | 0.718 | 0.116 | 0.200      | 0.304            | 0.927                                               | 12         |
|                      | DPCNADPIN   | 59         | 0.118 | 0.199 | 0.230 | 0.458 | 0.293 | 0.367 | 0.763 | 0.166 | 0.273     | 0.492 | 0.120 | 0.193      | 0.311            | 0.956                                               | 11         |
|                      | Core&Peel   | 47         | 0.096 | 0.170 | 0.262 | 0.558 | 0.199 | 0.334 | 0.681 | 0.154 | 0.251     | 0.511 | 0.100 | 0.167      | 0.263            | 0.850                                               | 15         |
|                      | IMHRC       | 109        | 0.306 | 0.564 | 0.521 | 0.587 | 0.649 | 0.617 | 0.853 | 0.456 | 0.595     | 0.661 | 0.299 | 0.411      | 0.717            | 2.082                                               | 9          |
|                      | PC2P        | 166        | 0.548 | 0.888 | 0.736 | 0.676 | 0.830 | 0.749 | 0.898 | 0.780 | 0.835     | 0.801 | 0.552 | 0.654      | 1.201            | 3.019                                               | 2          |
|                      | CC          | 186        | 0.562 | 0.884 | 0.731 | 0.703 | 0.737 | 0.720 | 0.844 | 0.772 | 0.806     | 0.726 | 0.560 | 0.632      | 1.194            | 2.972                                               | 3          |
|                      | WCC         | 186        | 0.562 | 0.884 | 0.731 | 0.703 | 0.737 | 0.720 | 0.844 | 0.772 | 0.806     | 0.726 | 0.560 | 0.632      | 1.194            | 2.972                                               | 3          |
|                      | OCC         | 225        | 0.605 | 0.934 | 0.617 | 0.600 | 0.854 | 0.716 | 0.813 | 0.846 | 0.830     | 0.649 | 0.606 | 0.627      | 1.231            | 3.084                                               | 1          |
|                      | OWCC        | 225        | 0.605 | 0.934 | 0.617 | 0.600 | 0.854 | 0.716 | 0.813 | 0.846 | 0.830     | 0.649 | 0.606 | 0.627      | 1.231            | 3.084                                               | 1          |
| CUBCO                | 171         | 0.422      | 0.717 | 0.617 | 0.672 | 0.735 | 0.703 | 0.515 | 0.627 | 0.565 | 0.333     | 0.343 | 0.338 | 0.760      | 2.407            | 6                                                   |            |
| CUBCO+               | 164         | 0.414      | 0.738 | 0.623 | 0.676 | 0.765 | 0.719 | 0.482 | 0.619 | 0.542 | 0.311     | 0.319 | 0.315 | 0.729      | 2.413            | 5                                                   |            |

**SupplementaryTable 3.** Comparative analysis of eight algorithms for prediction of protein complexes with respect to twelve performance measures as well as two composite scores.

| Comparative analysis |             |            |       |       |       |       |       |       |       |       |           |       |       |            |                  |                                                     |            |
|----------------------|-------------|------------|-------|-------|-------|-------|-------|-------|-------|-------|-----------|-------|-------|------------|------------------|-----------------------------------------------------|------------|
| E.coli - Met         |             |            |       |       |       |       |       |       |       |       |           |       |       |            |                  |                                                     |            |
| Data-set             | Method      | # Clusters | MMR   | FRM   | SEP   | PPV   | SN    | ACC   | Prec  | Rec   | F-measure | prec+ | rec+  | f-measure+ | MMR + f-measure+ | Composite Score (CS)<br>MMR + FRM + ACC + F-measure | CS Ranking |
| Babu                 | MCL         | 21         | 0.068 | 0.126 | 0.248 | 0.121 | 0.930 | 0.335 | 0.714 | 0.115 | 0.198     | 0.429 | 0.052 | 0.092      | 0.160            | 0.727                                               | 14         |
|                      | MCODE       | 12         | 0.027 | 0.086 | 0.237 | 0.357 | 0.216 | 0.278 | 0.417 | 0.040 | 0.073     | 0.250 | 0.017 | 0.032      | 0.060            | 0.465                                               | 17         |
|                      | CFinder     | 21         | 0.044 | 0.086 | 0.219 | 0.174 | 0.622 | 0.329 | 0.429 | 0.080 | 0.135     | 0.333 | 0.040 | 0.072      | 0.115            | 0.594                                               | 15         |
|                      | AP          | 48         | 0.088 | 0.224 | 0.320 | 0.241 | 0.615 | 0.385 | 0.396 | 0.155 | 0.223     | 0.188 | 0.052 | 0.081      | 0.169            | 0.920                                               | 11         |
|                      | CMC         | 23         | 0.044 | 0.098 | 0.193 | 0.466 | 0.178 | 0.288 | 0.391 | 0.080 | 0.133     | 0.217 | 0.029 | 0.051      | 0.095            | 0.564                                               | 16         |
|                      | ClusterOne  | 96         | 0.155 | 0.408 | 0.261 | 0.330 | 0.718 | 0.487 | 0.323 | 0.224 | 0.265     | 0.177 | 0.098 | 0.126      | 0.281            | 1.314                                               | 6          |
|                      | PEWCC       | 91         | 0.096 | 0.213 | 0.168 | 0.330 | 0.460 | 0.390 | 0.308 | 0.132 | 0.185     | 0.154 | 0.080 | 0.106      | 0.202            | 0.883                                               | 12         |
|                      | ProrankPlus | 27         | 0.082 | 0.138 | 0.263 | 0.445 | 0.246 | 0.331 | 0.630 | 0.126 | 0.211     | 0.593 | 0.092 | 0.159      | 0.241            | 0.762                                               | 13         |
|                      | DPCNADPIN   | 85         | 0.112 | 0.264 | 0.179 | 0.300 | 0.603 | 0.425 | 0.365 | 0.161 | 0.223     | 0.165 | 0.080 | 0.108      | 0.220            | 1.025                                               | 10         |
|                      | Core&Peel   | 19         | 0.006 | 0.017 | 0.051 | 0.488 | 0.061 | 0.173 | 0.053 | 0.011 | 0.019     | 0.053 | 0.006 | 0.010      | 0.017            | 0.215                                               | 18         |
|                      | IMHRC       | 70         | 0.126 | 0.293 | 0.297 | 0.311 | 0.671 | 0.457 | 0.314 | 0.144 | 0.197     | 0.157 | 0.063 | 0.090      | 0.216            | 1.073                                               | 9          |
|                      | PC2P        | 67         | 0.169 | 0.391 | 0.414 | 0.351 | 0.655 | 0.479 | 0.552 | 0.259 | 0.352     | 0.269 | 0.103 | 0.149      | 0.319            | 1.392                                               | 5          |
|                      | CC          | 83         | 0.207 | 0.420 | 0.463 | 0.445 | 0.577 | 0.507 | 0.578 | 0.345 | 0.432     | 0.361 | 0.172 | 0.233      | 0.441            | 1.566                                               | 2          |
|                      | WCC         | 81         | 0.194 | 0.379 | 0.438 | 0.420 | 0.563 | 0.487 | 0.543 | 0.310 | 0.395     | 0.346 | 0.161 | 0.220      | 0.414            | 1.455                                               | 4          |
|                      | OCC         | 135        | 0.184 | 0.448 | 0.194 | 0.224 | 0.768 | 0.415 | 0.244 | 0.218 | 0.231     | 0.119 | 0.092 | 0.104      | 0.288            | 1.278                                               | 8          |
|                      | OWCC        | 134        | 0.201 | 0.431 | 0.198 | 0.229 | 0.765 | 0.418 | 0.246 | 0.230 | 0.238     | 0.142 | 0.109 | 0.123      | 0.325            | 1.289                                               | 7          |
| CUBCO                | 108         | 0.239      | 0.517 | 0.439 | 0.406 | 0.556 | 0.475 | 0.519 | 0.408 | 0.457 | 0.194     | 0.121 | 0.149 | 0.388      | 1.688            | 1                                                   |            |
| CUBCO+               | 107         | 0.214      | 0.452 | 0.448 | 0.432 | 0.509 | 0.469 | 0.467 | 0.351 | 0.401 | 0.168     | 0.107 | 0.131 | 0.345      | 1.537            | 3                                                   |            |
| Data-set             | Method      | # Clusters | MMR   | FRM   | SEP   | PPV   | SN    | ACC   | Prec  | Rec   | F-measure | prec+ | rec+  | f-measure+ | MMR + f-measure+ | Composite Score (CS)<br>MMR + FRM + ACC + F-measure | CS Ranking |
| Cong                 | MCL         | 83         | 0.441 | 0.760 | 0.666 | 0.551 | 0.930 | 0.716 | 0.867 | 0.630 | 0.730     | 0.795 | 0.429 | 0.557      | 0.998            | 2.646                                               | 5          |
|                      | MCODE       | 20         | 0.103 | 0.156 | 0.360 | 0.844 | 0.180 | 0.390 | 0.950 | 0.143 | 0.248     | 0.950 | 0.123 | 0.218      | 0.321            | 0.897                                               | 10         |
|                      | CFinder     | 18         | 0.091 | 0.143 | 0.342 | 0.813 | 0.175 | 0.378 | 1.000 | 0.136 | 0.240     | 1.000 | 0.117 | 0.209      | 0.301            | 0.852                                               | 13         |
|                      | AP          | 96         | 0.504 | 0.818 | 0.695 | 0.630 | 0.881 | 0.745 | 0.906 | 0.740 | 0.815     | 0.833 | 0.519 | 0.640      | 1.144            | 2.881                                               | 4          |
|                      | CMC         | 20         | 0.085 | 0.143 | 0.324 | 0.870 | 0.147 | 0.358 | 0.850 | 0.123 | 0.215     | 0.850 | 0.110 | 0.195      | 0.280            | 0.801                                               | 15         |
|                      | ClusterOne  | 68         | 0.301 | 0.455 | 0.484 | 0.656 | 0.603 | 0.629 | 0.897 | 0.435 | 0.586     | 0.750 | 0.331 | 0.459      | 0.760            | 1.970                                               | 8          |
|                      | PEWCC       | 20         | 0.065 | 0.136 | 0.283 | 0.588 | 0.208 | 0.350 | 0.750 | 0.123 | 0.212     | 0.500 | 0.065 | 0.115      | 0.179            | 0.762                                               | 16         |
|                      | ProrankPlus | 28         | 0.105 | 0.162 | 0.281 | 0.685 | 0.203 | 0.373 | 0.857 | 0.136 | 0.235     | 0.714 | 0.130 | 0.220      | 0.325            | 0.876                                               | 12         |
|                      | DPCNADPIN   | 35         | 0.110 | 0.149 | 0.248 | 0.713 | 0.227 | 0.402 | 0.800 | 0.136 | 0.233     | 0.514 | 0.117 | 0.190      | 0.300            | 0.894                                               | 11         |
|                      | Core&Peel   | 24         | 0.092 | 0.143 | 0.304 | 0.780 | 0.157 | 0.349 | 0.833 | 0.130 | 0.225     | 0.750 | 0.117 | 0.202      | 0.294            | 0.809                                               | 14         |
|                      | IMHRC       | 63         | 0.297 | 0.455 | 0.506 | 0.644 | 0.596 | 0.620 | 0.889 | 0.416 | 0.566     | 0.778 | 0.318 | 0.452      | 0.749            | 1.938                                               | 9          |
|                      | PC2P        | 105        | 0.552 | 0.877 | 0.713 | 0.677 | 0.834 | 0.752 | 0.905 | 0.857 | 0.880     | 0.819 | 0.558 | 0.664      | 1.216            | 3.061                                               | 2          |
|                      | CC          | 114        | 0.528 | 0.929 | 0.700 | 0.682 | 0.734 | 0.707 | 0.851 | 0.792 | 0.820     | 0.719 | 0.532 | 0.612      | 1.140            | 2.984                                               | 3          |
|                      | WCC         | 114        | 0.528 | 0.929 | 0.700 | 0.682 | 0.734 | 0.707 | 0.851 | 0.792 | 0.820     | 0.719 | 0.532 | 0.612      | 1.140            | 2.984                                               | 3          |
|                      | OCC         | 133        | 0.565 | 0.929 | 0.615 | 0.645 | 0.843 | 0.738 | 0.857 | 0.812 | 0.834     | 0.654 | 0.565 | 0.606      | 1.172            | 3.065                                               | 1          |
|                      | OWCC        | 133        | 0.565 | 0.929 | 0.615 | 0.645 | 0.843 | 0.738 | 0.857 | 0.812 | 0.834     | 0.654 | 0.565 | 0.606      | 1.172            | 3.065                                               | 1          |
| CUBCO                | 105         | 0.389      | 0.771 | 0.614 | 0.644 | 0.782 | 0.710 | 0.590 | 0.695 | 0.638 | 0.390     | 0.313 | 0.347 | 0.736      | 2.508            | 7                                                   |            |
| CUBCO+               | 103         | 0.388      | 0.808 | 0.586 | 0.604 | 0.820 | 0.704 | 0.534 | 0.712 | 0.610 | 0.388     | 0.320 | 0.351 | 0.738      | 2.510            | 6                                                   |            |
